# Supplementary material
Source: HighWire-hosted journal article supplement (https://jnm.snmjournals.org/highwire/filestream/95333/field_highwire_adjunct_files/0/199935_Supplemental_Data.pdf)
Supplement: 199935_Supplemental_Data.pdf [file 199935_Supplemental_Data.pdf]

**SUPPLEMENTAL FIGURE LEGEND**

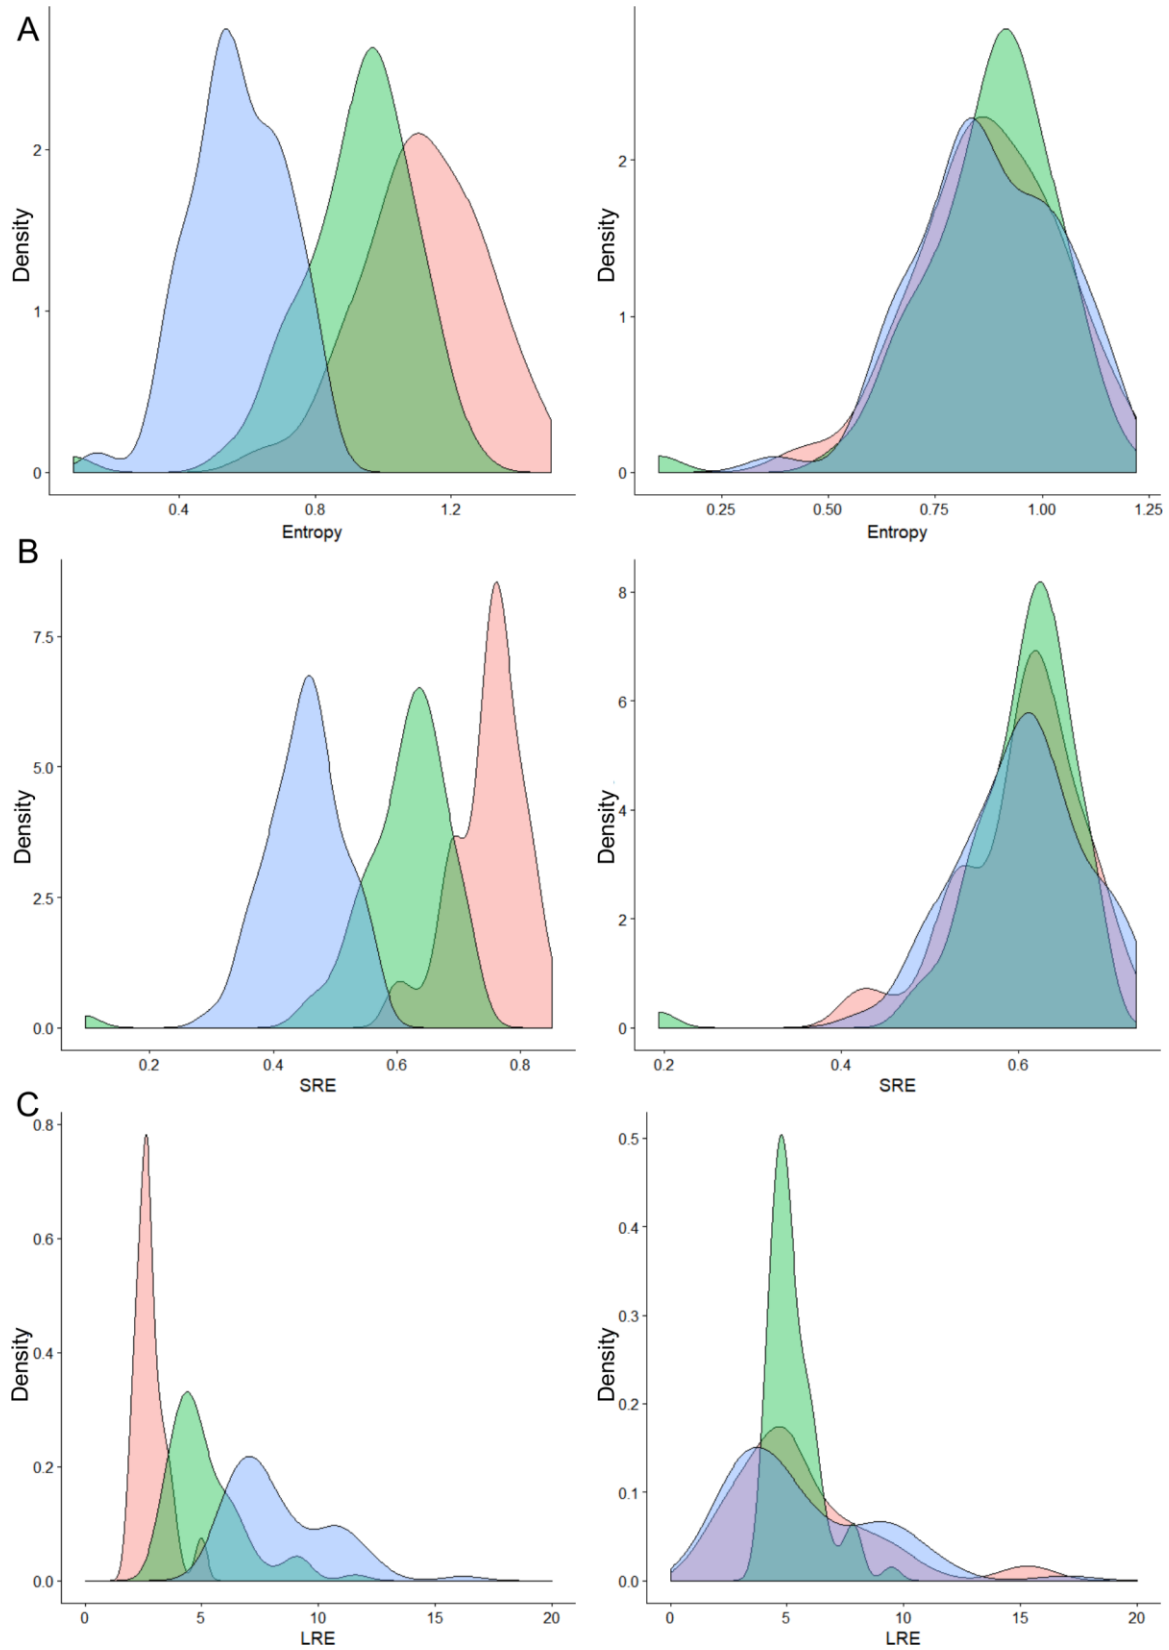

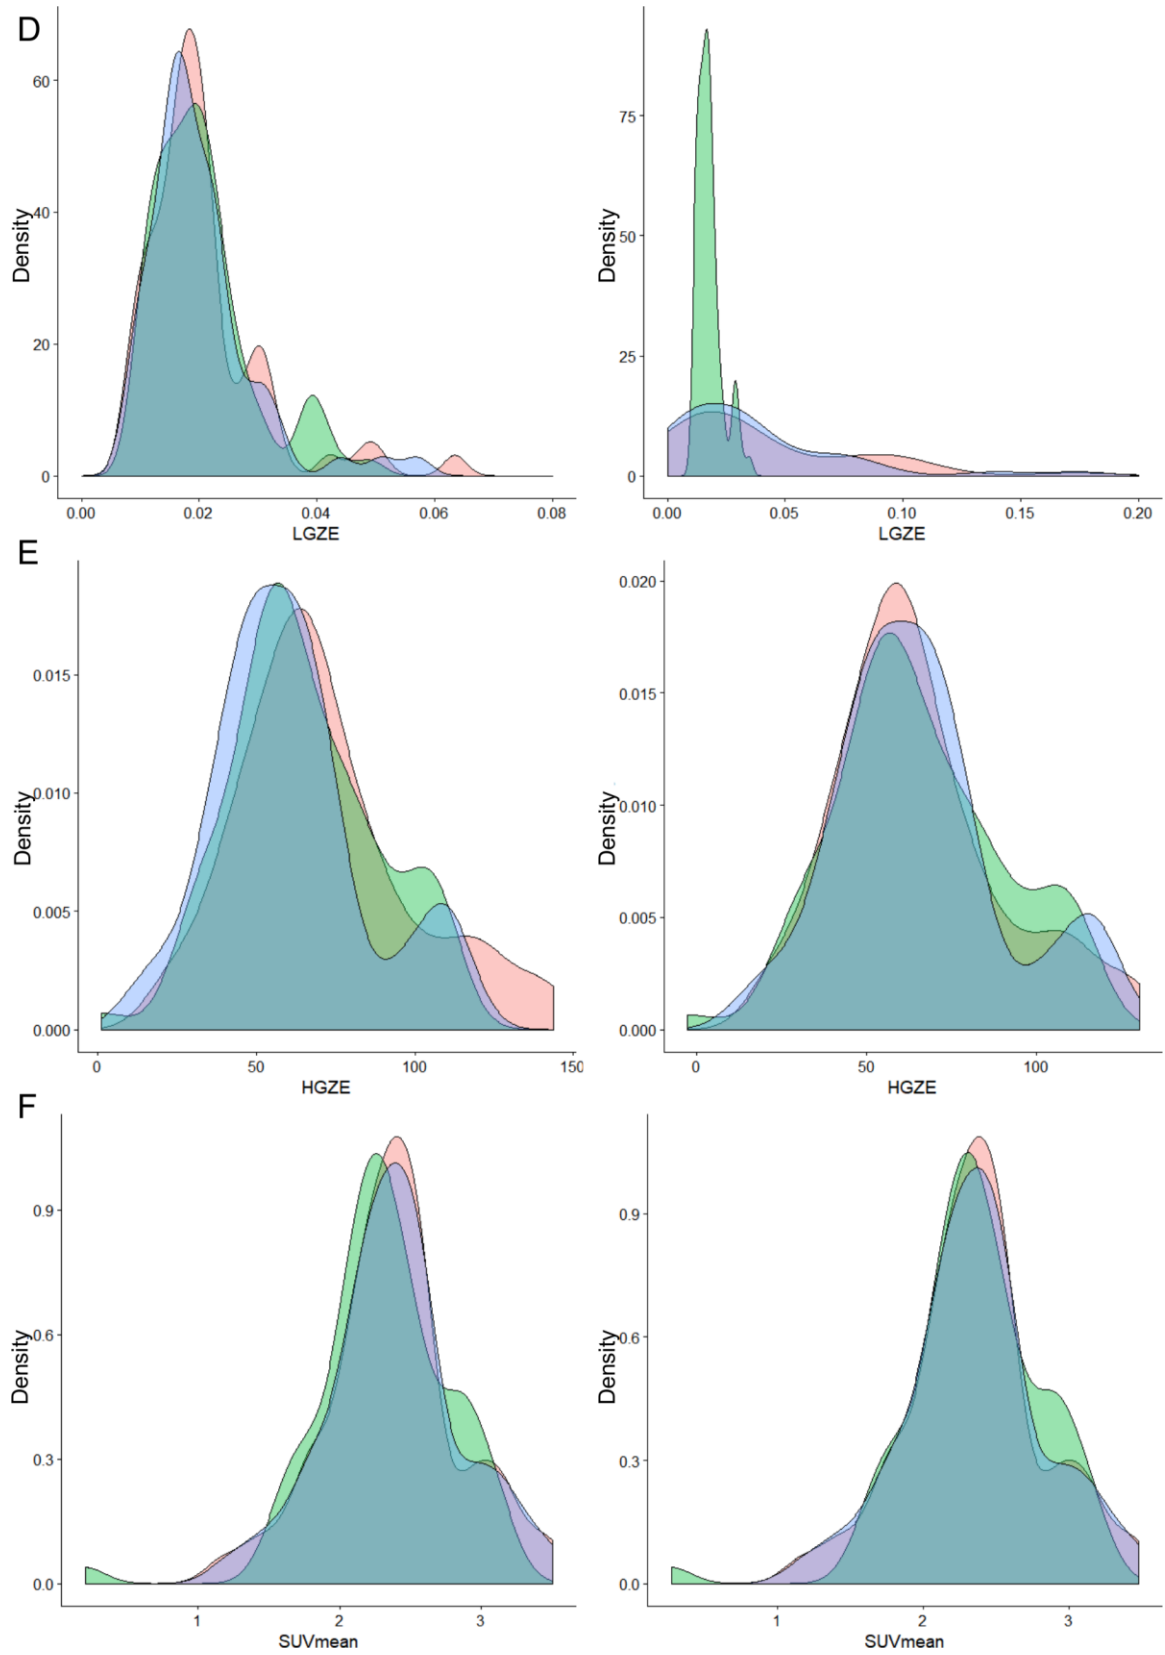

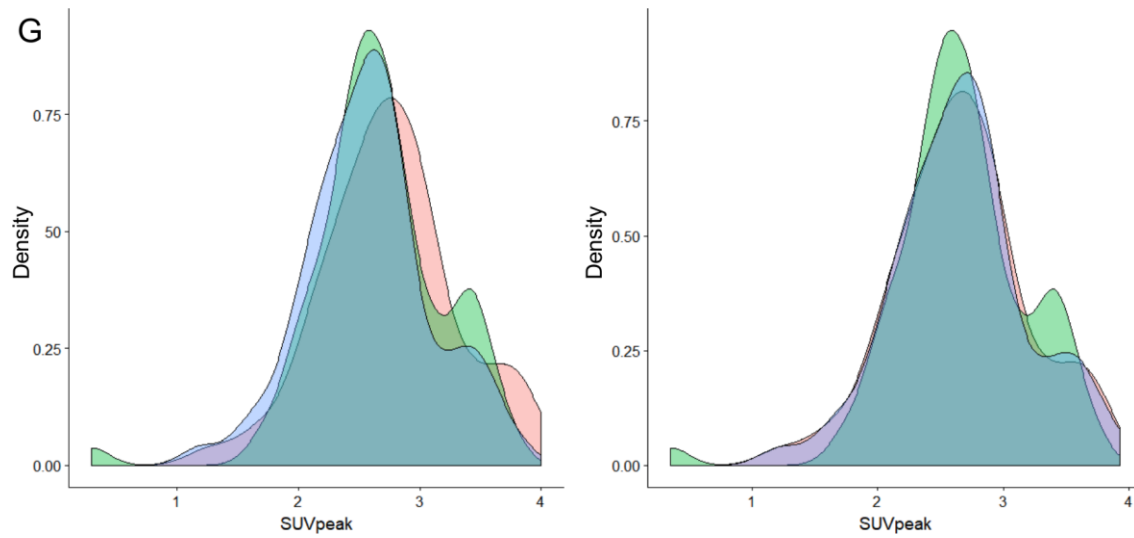

**Supplemental Figure 1:** Probability density function (%) of features from the liver tissue in Department A (pink), Department B (green) and Department A-S (blue), before (left) and after ComBat harmonization (right).

A

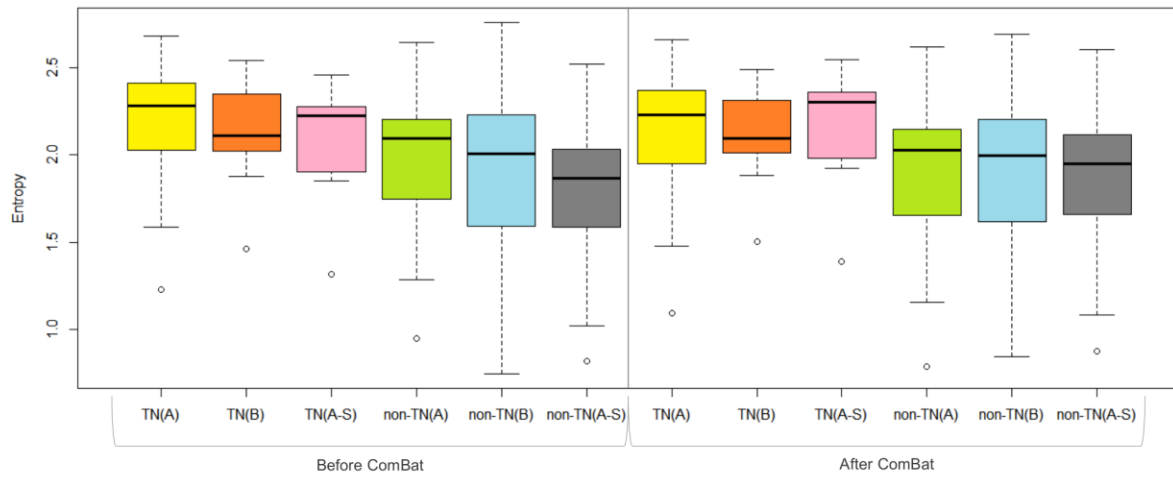

B

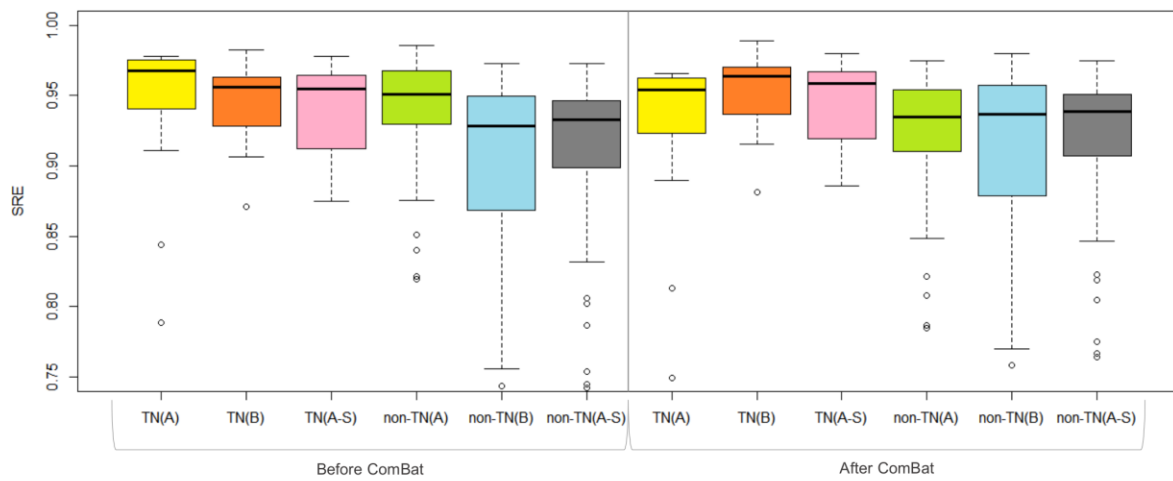

C

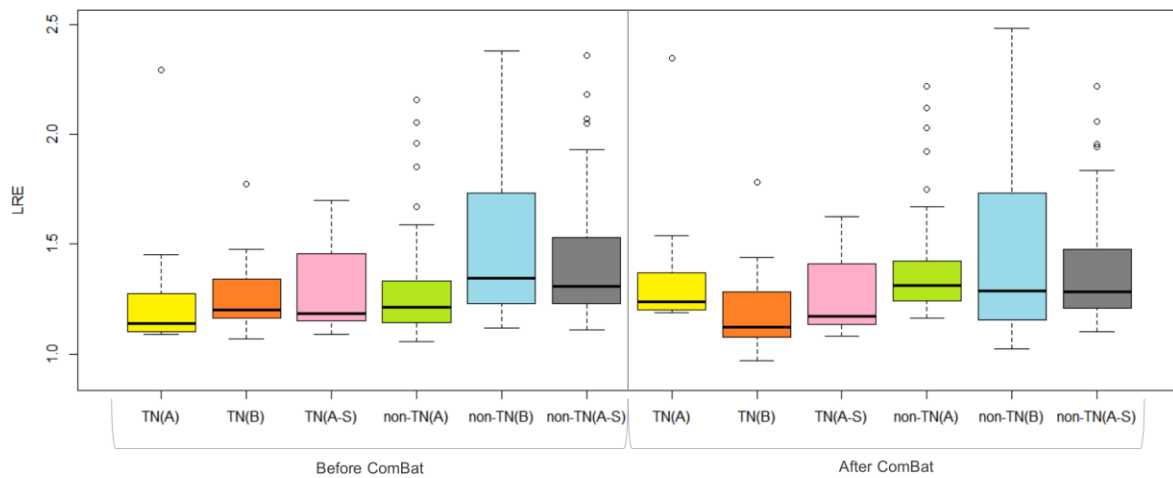

D

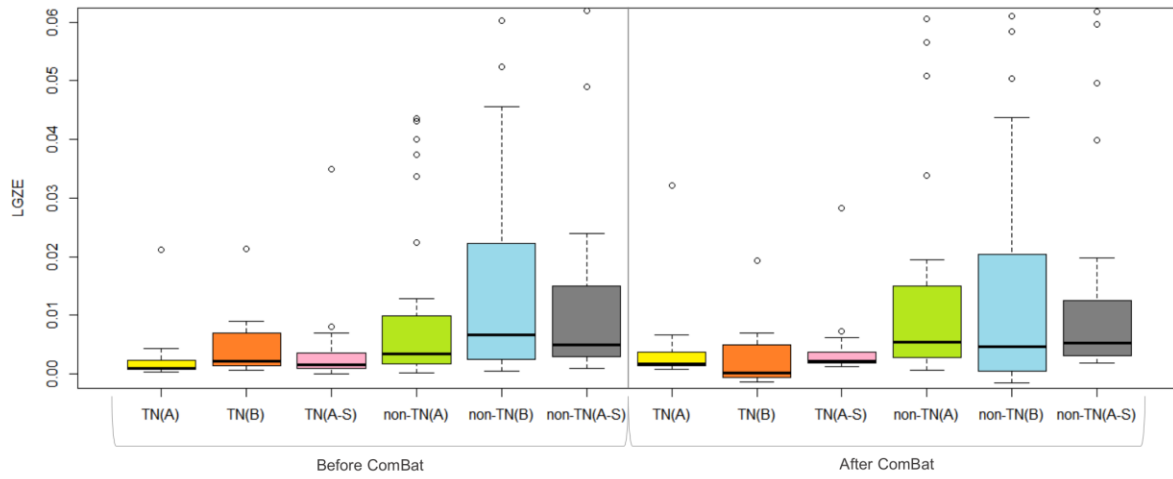

E

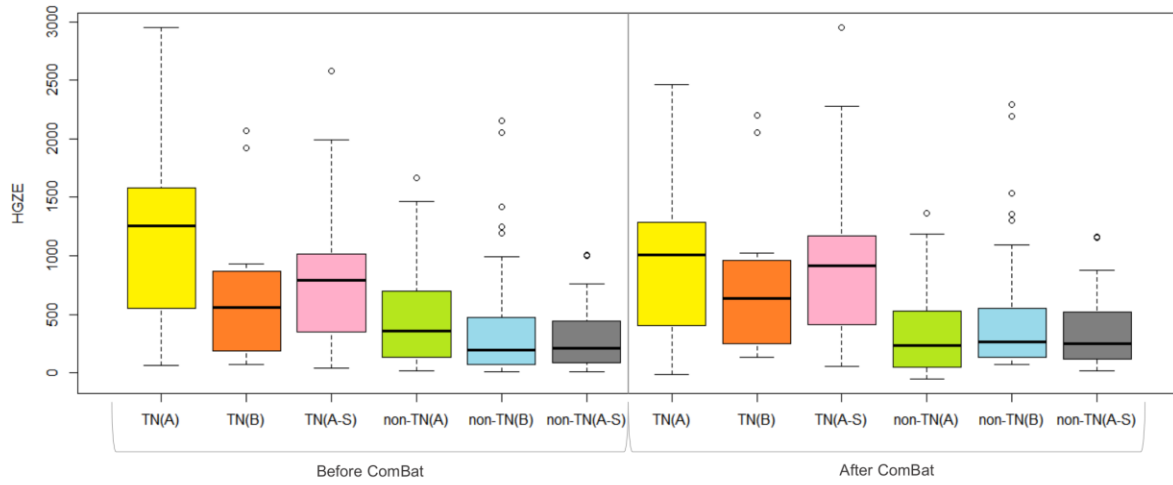

F

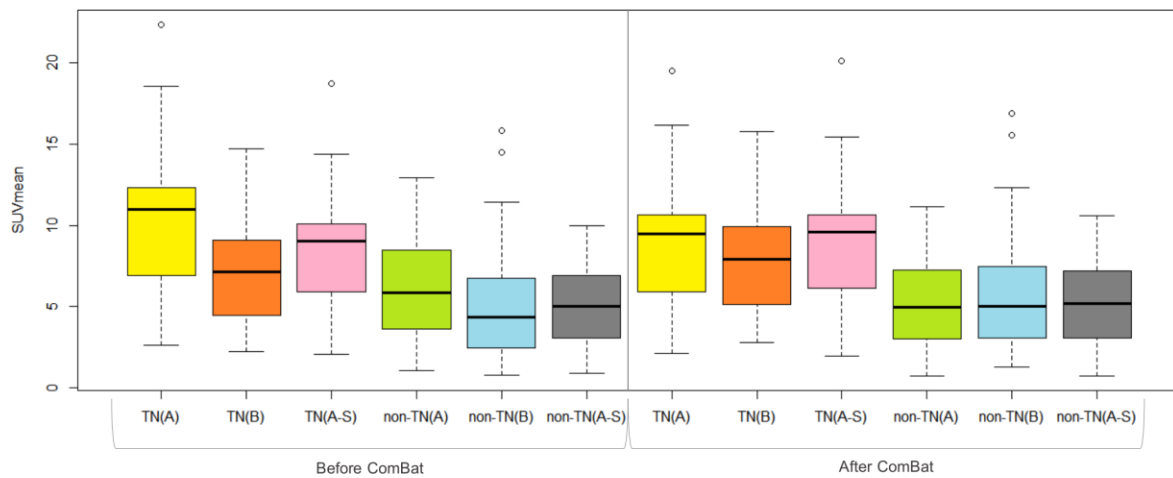

G

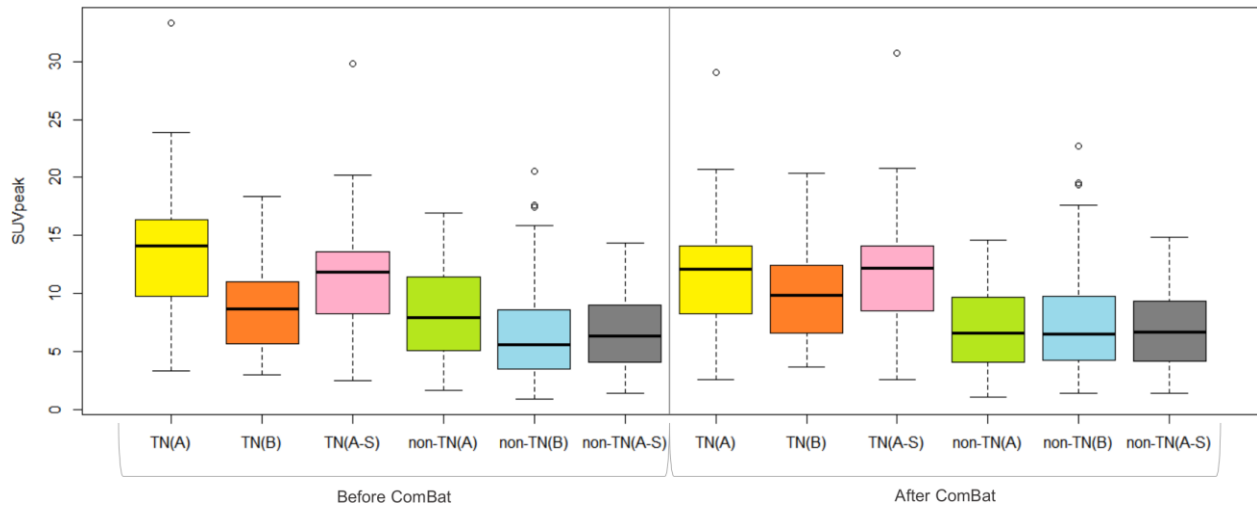

**Supplemental Figure 2:** Boxplots of features for triple-negative (TN) and non-triple-negative (non-TN) lesions before and after ComBat harmonization, for the three departments separately.

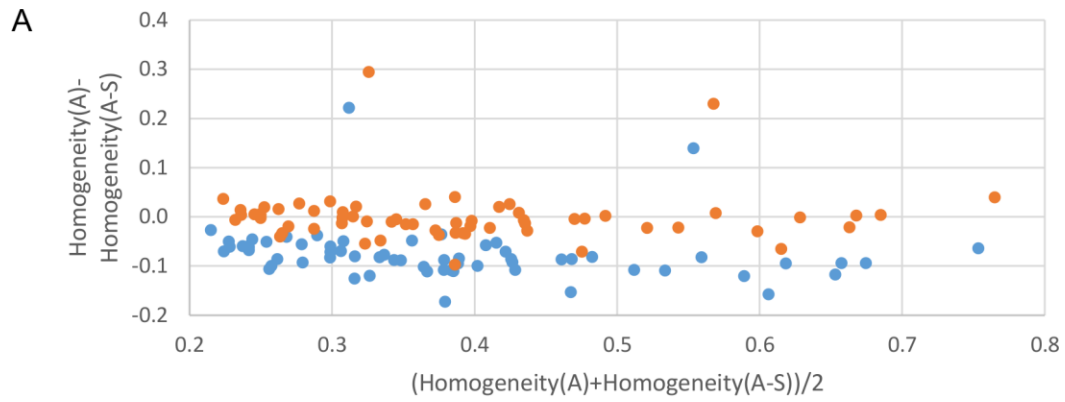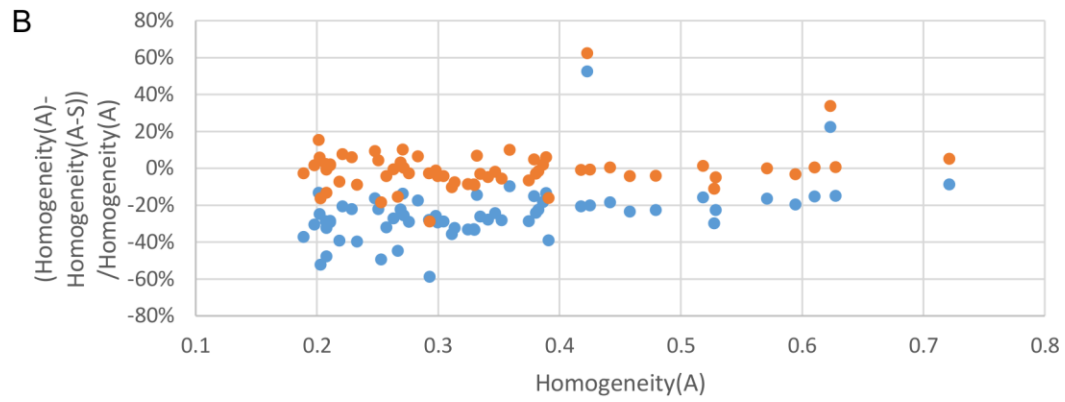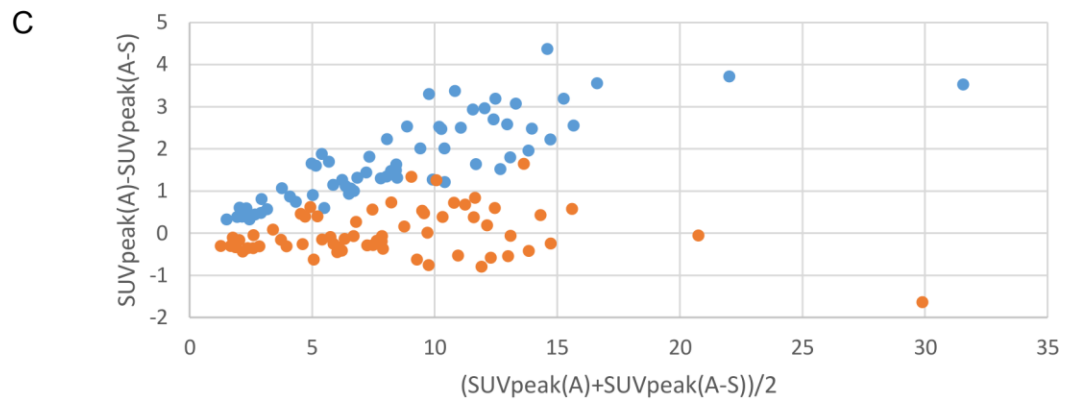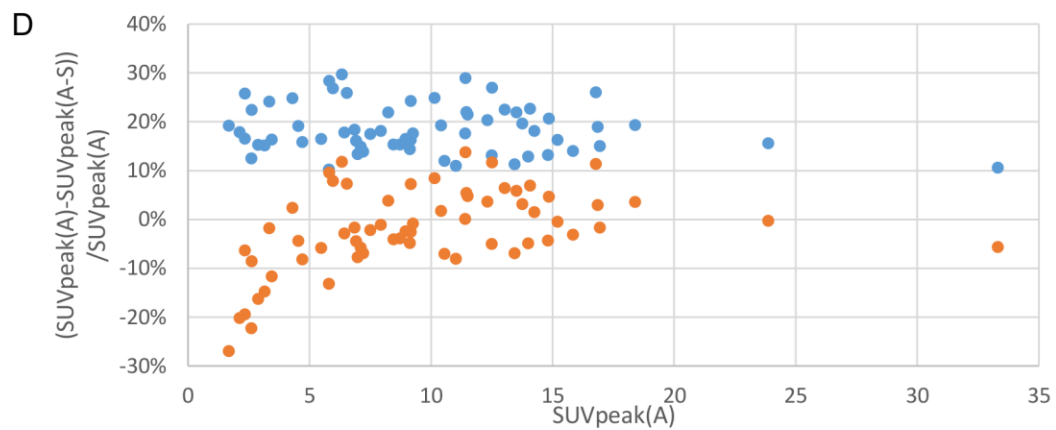

**Supplemental Figure 3:** Bland-Altman plots (A,C) and plots of the percentage difference between features from Department A and Department A-S (B,D) before (blue) and after ComBat harmonization (orange) in tumors for Homogeneity (A,B) and SUV<sub>peak</sub> (C,D).



A

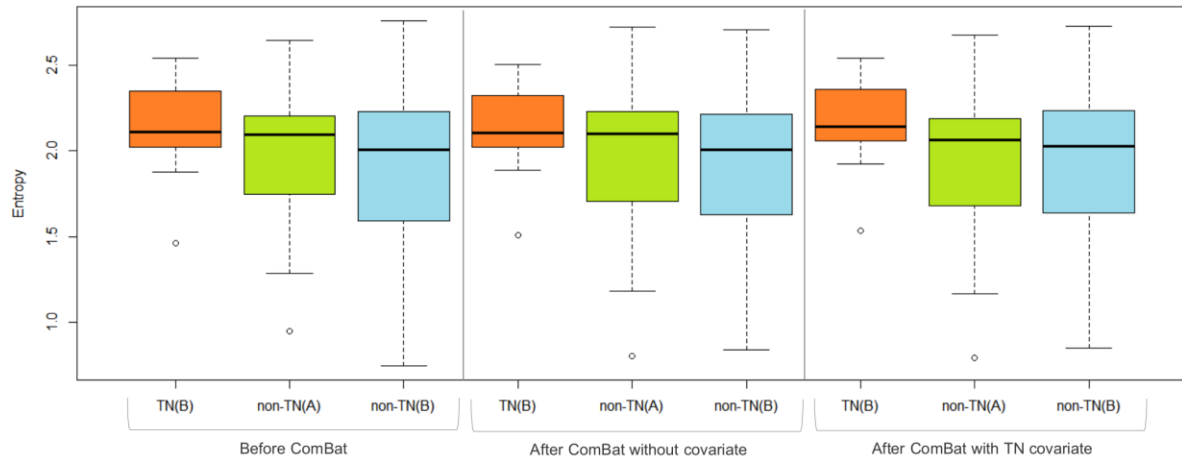

B

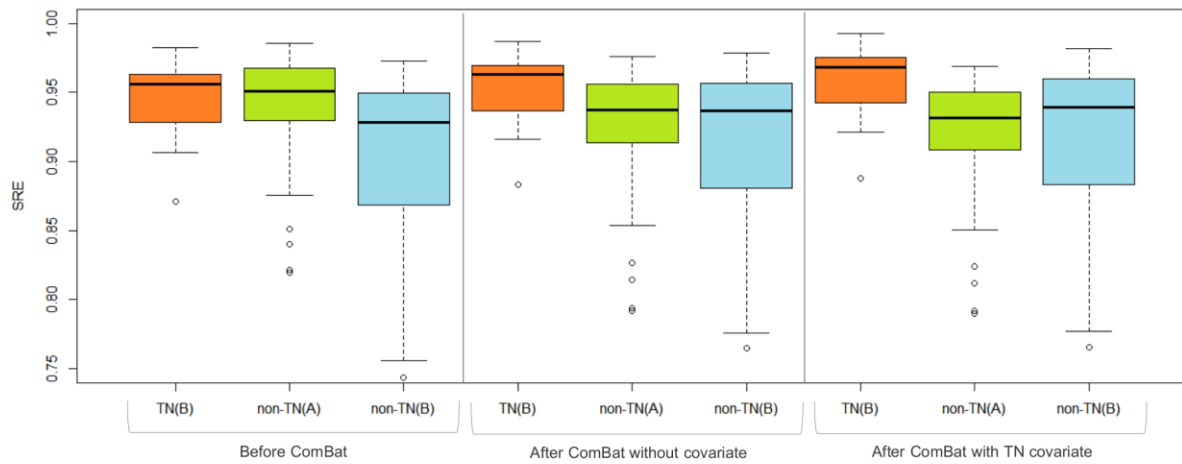

C

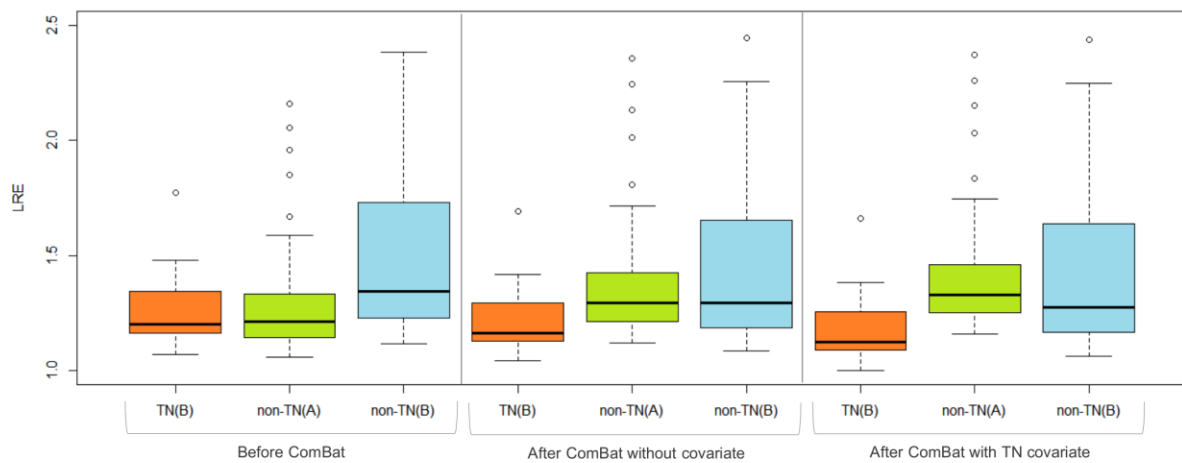

D

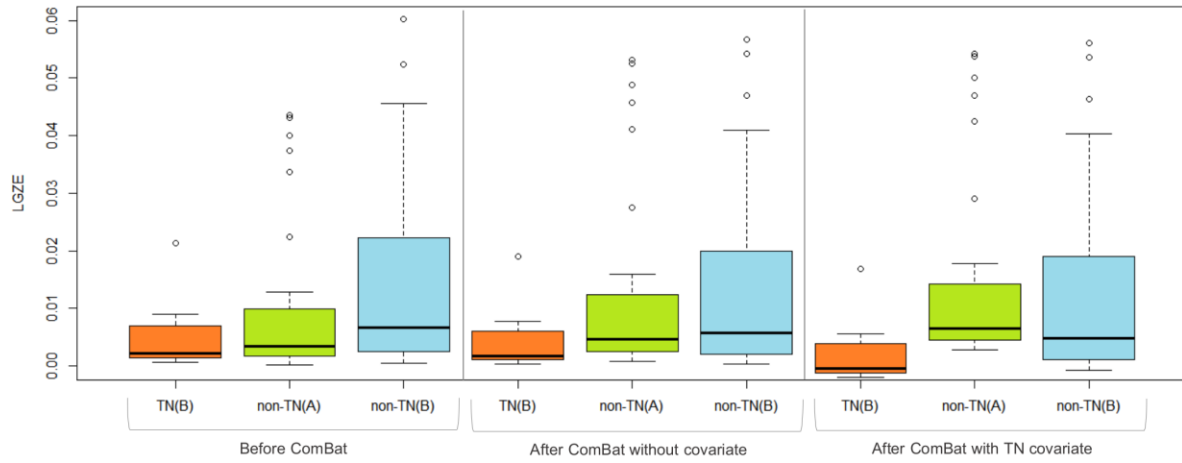

E

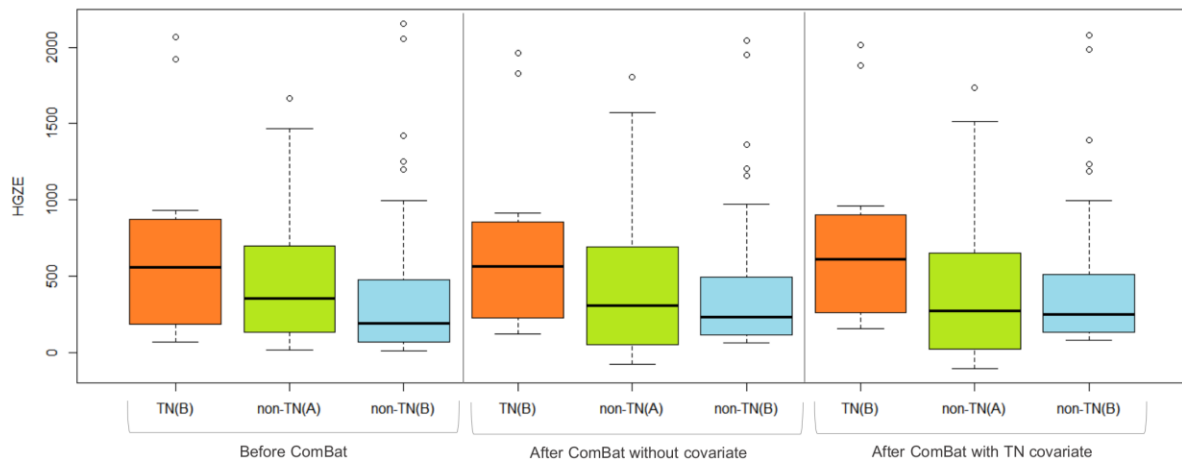

F

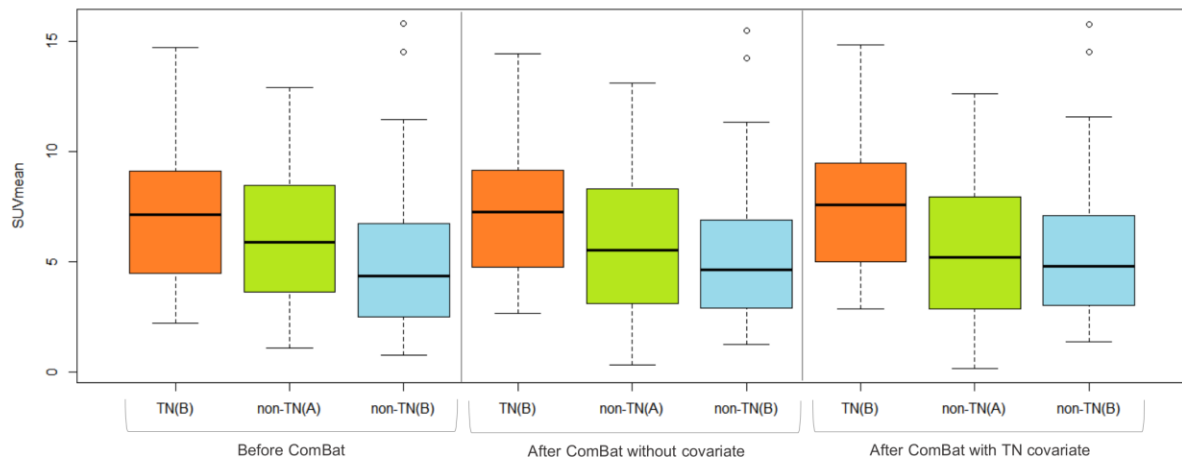

G

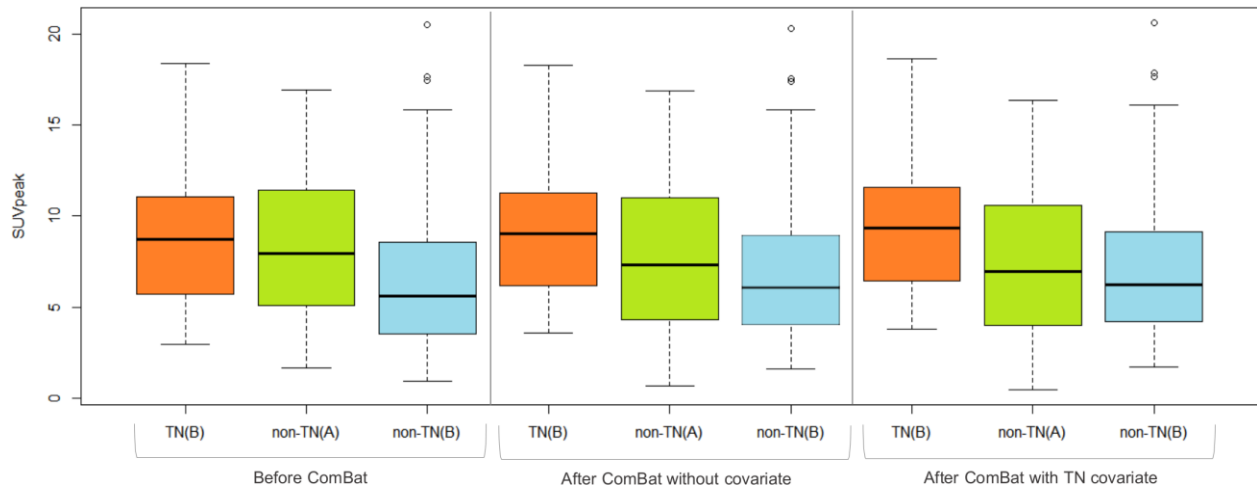

**Supplemental Figure 4:** Boxplots of features for triple-negative (TN) and non-triple-negative (non-TN) lesions before and after ComBat harmonization without and with TN status as a covariate, for Departments A and B separately when removing all TN in Department A to determine the transformations.

|                    | Before ComBat             |                               |                        |                                        |                                      |                                | After ComBat           |                                        |                                           |                                 |
|--------------------|---------------------------|-------------------------------|------------------------|----------------------------------------|--------------------------------------|--------------------------------|------------------------|----------------------------------------|-------------------------------------------|---------------------------------|
|                    | TN(A)<br>vs non-<br>TN(A) | TN(A-S)<br>vs non-<br>TN(A-S) | TN(A)<br>vs<br>TN(A-S) | non-<br>TN(A)<br>vs<br>non-<br>TN(A-S) | TN(A+A-S)<br>vs<br>non-<br>TN(A+A-S) | TN(A-S)<br>vs<br>non-<br>TN(A) | TN(A)<br>vs<br>TN(A-S) | non-<br>TN(A)<br>vs<br>non-<br>TN(A-S) | TN(A+A-<br>S) vs<br>non-<br>TN(A+A-<br>S) | TN(A-<br>S) vs<br>non-<br>TN(A) |
| <b>Homogeneity</b> | 0.0810                    | <b>0.0103</b>                 | 0.1596                 | <b>0.0006</b>                          | <b>0.0035</b>                        | 0.7965                         | 0.6420                 | 0.6034                                 | <b>0.0022</b>                             | <b>0.0124</b>                   |
| <b>Entropy</b>     | <b>0.0205</b>             | <b>0.0007</b>                 | 0.3809                 | <b>0.0147</b>                          | <b>0.0001</b>                        | 0.0587                         | 0.5147                 | 0.7179                                 | <b>7.87e-05</b>                           | <b>0.0016</b>                   |
| <b>SRE</b>         | 0.2175                    | 0.0525                        | 0.1835                 | <b>0.0015</b>                          | <b>0.0282</b>                        | 0.7724                         | 0.4016                 | 0.7749                                 | <b>0.0241</b>                             | 0.0609                          |
| <b>LRE</b>         | 0.2618                    | 0.0867                        | 0.1713                 | <b>0.0031</b>                          | <b>0.0428</b>                        | 0.8329                         | 0.0938                 | 0.5124                                 | <b>0.0457</b>                             | <b>0.0172</b>                   |
| <b>LGZE</b>        | <b>0.0005</b>             | <b>0.0003</b>                 | 0.1381                 | <b>0.0472</b>                          | <b>1.77e-06</b>                      | <b>0.0327</b>                  | 0.2099                 | 0.6899                                 | <b>1.50e-06</b>                           | <b>0.0041</b>                   |
| <b>HGZE</b>        | <b>0.0002</b>             | <b>0.0002</b>                 | 0.0938                 | <b>0.0284</b>                          | <b>1.01e-06</b>                      | <b>0.0289</b>                  | 0.7804                 | 0.6246                                 | <b>6.37e-07</b>                           | <b>0.0004</b>                   |
| <b>SUVmax</b>      | <b>0.0006</b>             | <b>0.0002</b>                 | 0.0731                 | <b>0.0050</b>                          | <b>5.13e-06</b>                      | 0.1737                         | 0.9556                 | 0.9820                                 | <b>1.10e-06</b>                           | <b>0.0005</b>                   |
| <b>SUVmean</b>     | <b>0.0003</b>             | <b>0.0002</b>                 | 0.1381                 | 0.0820                                 | <b>9.52e-07</b>                      | <b>0.0150</b>                  | 0.8965                 | 0.9880                                 | <b>4.49e-07</b>                           | <b>0.0002</b>                   |
| <b>SUVpeak</b>     | <b>0.0004</b>             | <b>0.0002</b>                 | 0.2703                 | 0.0660                                 | <b>1.23e-06</b>                      | <b>0.0196</b>                  | 0.8672                 | 0.9940                                 | <b>6.01e-07</b>                           | <b>0.0003</b>                   |

**Supplemental Table 1:** P-values of Wilcoxon's test for all features between TN and non-TN lesions from Departments A and A-S, before and after ComBat harmonization. Bold values are less than 0.05.

|             | Before ComBat | After ComBat<br>without TN Cov | After ComBat<br>with TN Cov |
|-------------|---------------|--------------------------------|-----------------------------|
| Homogeneity | 0.4635        | <b>0.0265</b>                  | <b>0.0039</b>               |
| Entropy     | 0.0875        | 0.1232                         | <b>0.0254</b>               |
| SRE         | 0.9410        | <b>0.0203</b>                  | <b>0.0002</b>               |
| LRE         | 0.9352        | <b>0.0039</b>                  | <b>7.64e-05</b>             |
| LGZE        | 0.3786        | <b>0.0132</b>                  | <b>1.80e-06</b>             |
| HGZE        | 0.2886        | 0.1041                         | <b>0.0254</b>               |
| SUVmax      | 0.4058        | 0.1192                         | <b>0.0423</b>               |
| SUVmean     | 0.2394        | 0.0939                         | <b>0.0359</b>               |
| SUVpeak     | 0.4736        | 0.1403                         | <b>0.0478</b>               |

**Supplemental Table 2:** P-values of Wilcoxon's tests for all features between TN in Department B and non-TN in Department A when the proportion of TN tumors was very different in the two departments, before and after ComBat harmonization without and with TN as a covariate of interest. Bold values are less than 0.05.
